# Supplementary material for: Resistance characterization and transcriptomic analysis of imipenem-induced drug resistance in Escherichia coli
Source: PeerJ. 2024 Nov 29;12:e18572. doi: 10.7717/peerj.18572 (PMC11610472; doi:10.7717/peerj.18572)
Supplement: Supplemental Information 13 [file peerj-12-18572-s013.xlsx]

## Sheet: Sheet1
number of generations	MIC (μg/mL)
1	0.03
2	0.06
3	0.125
4	0.25
5	0.5
6	1
7	1
8	2
9	2
10	4
11	4
12	8
13	8
14	16
15	16
16	16
