# Supplementary material for: Resistance characterization and transcriptomic analysis of imipenem-induced drug resistance in Escherichia coli
Source: PeerJ. 2024 Nov 29;12:e18572. doi: 10.7717/peerj.18572 (PMC11610472; doi:10.7717/peerj.18572)
Supplement: Supplemental Information 14 [file peerj-12-18572-s014.xlsx]

## Sheet: Sheet1
Hours	K-12			MIC16			MIC8			MIC4			MIC1
2	0.037	0.031	0.054	0.042	0.058	0.042	0.096	0.058	0.063	0.086	0.076	0.059	0.07	0.075	0.052
4	0.383	0.377	0.417	0.069	0.087	0.082	0.185	0.129	0.162	0.275	0.218	0.241	0.128	0.182	0.161
6	0.918	0.921	0.918	0.506	0.506	0.54	0.768	0.808	0.81	1.024	0.984	1.093	0.808	0.644	0.867
8	1.068	1.054	1.076	1.26	1.274	1.136	1.263	1.4	1.404	1.652	1.471	1.84	1.226	1.165	1.111
10	1.419	1.429	1.427	1.418	1.569	1.511	1.476	1.481	1.503	1.584	1.595	1.752	1.505	1.36	1.415
12	1.802	1.778	1.76	1.665	1.62	1.796	1.745	1.661	1.746	1.771	1.792	1.85	1.702	1.677	1.514
