# Supplementary material for: Resistance characterization and transcriptomic analysis of imipenem-induced drug resistance in Escherichia coli
Source: PeerJ. 2024 Nov 29;12:e18572. doi: 10.7717/peerj.18572 (PMC11610472; doi:10.7717/peerj.18572)
Supplement: Supplemental Information 15 [file peerj-12-18572-s015.xlsx]

## Sheet: Sheet1
lawn diameters (mm)
	WT	IPM-R
swimming	26.362	5.154
	27.427	5.245
	27.645	5.328
swamming	12.977	5.323
	15.155	5.172
	11.301	5.055
