# Supplementary material for: Resistance characterization and transcriptomic analysis of imipenem-induced drug resistance in Escherichia coli
Source: PeerJ. 2024 Nov 29;12:e18572. doi: 10.7717/peerj.18572 (PMC11610472; doi:10.7717/peerj.18572)
Supplement: Supplemental Information 16 [file peerj-12-18572-s016.xlsx]

## Sheet: Sheet1
hours	WT K-12			IPM-R
6	0.2226	0.2024	0.2313	0.327	0.3204	0.3207
12	0.3319	0.3335	0.3191	0.5182	0.4798	0.4342
18	0.3162	0.2915	0.3213	0.4751	0.3746	0.3787
24	0.6184	0.7857	0.857	1.4401	1.2883	1.1468
30	0.6935	0.8449	0.6952	1.9204	2.3172	2.3356
